# Supplementary material for: Curing Mice with Large Tumors by Locally Delivering Combinations of Immunomodulatory Antibodies
Source: Oxford University Press journal article supplement (doi:10.1158/1078-0432.ccr-14-1339), 2014-08-21
Supplement: 10780432ccr141339-sup-132209_1_supp_data_2580515_n9hsd5.docx [file 10780432ccr141339-sup-132209_1_supp_data_2580515_n9hsd5.docx]

**Supplementary figure 1.** Bar graphs show lymphocyte components in TLNs from naive mice and mice transplanted with 5×105 B16 cells or syngeneic normal cells 1 day prior to euthanasia.

**Supplementary figure 2.** Representative flow cytomery histograms show the expression of various surface molecules by TLN and spleen cells from mice receiving the indicated treatments.

**Supplementary figure 3.** Representative flow cytomery dotplots show CD19+ cells (most of which are also CD20 positive) were depleted by administration of the 4 mAb combination.

**Supplementary figure 4.**  Representative flow cytometry histograms show the expression of various surface molecules by TIL from mice which received the indicated treatments.
